# The Influenza Virus Protein PB1-F2 Interacts with IKK $\beta$ and Modulates NF- $\kappa$ B Signalling

Ana Luísa Reis<sup>‡</sup>, John W. McCauley\*

Division of Virology, MRC National Institute for Medical Research, London, United Kingdom

## Abstract

PB1-F2, a protein encoded by a second open reading frame of the influenza virus RNA segment 2, has emerged as a modulator of lung inflammatory responses but the molecular mechanisms underlying this are only poorly understood. Here we show that PB1-F2 inhibits the activation of NF- $\kappa$ B dependent signalling pathways in luciferase reporter assays. PB1-F2 proteins from four different viruses interact with IKK $\beta$  in yeast two-hybrid assays and by co-immunoprecipitation. PB1-F2 expression did not inhibit IKK $\beta$  kinase activity or NF- $\kappa$ B translocation into the nucleus, but NF- $\kappa$ B binding to DNA was severely impaired in PB1-F2 transfected cells as assessed by Electrophoretic Mobility Shift Assay. Neither the N-terminal 57 amino acid truncated forms nor the C-terminus of PB1-F2 were able to inhibit NF- $\kappa$ B dependent signalling, indicating that the full length protein is necessary for the inhibition.

**Citation:** Reis AL, McCauley JW (2013) The Influenza Virus Protein PB1-F2 Interacts with IKK $\beta$  and Modulates NF- $\kappa$ B Signalling. PLoS ONE 8(5): e63852. doi:10.1371/journal.pone.0063852

**Editor:** Paul Digard, University of Edinburgh, United Kingdom

**Received:** January 20, 2013; **Accepted:** April 7, 2013; **Published:** May 21, 2013

**Copyright:** © 2013 Reis, McCauley. This is an open-access article distributed under the terms of the Creative Commons Attribution License, which permits unrestricted use, distribution, and reproduction in any medium, provided the original author and source are credited.

**Funding:** This work was funded by the Medical Research Council through programme U117585868. The funders had no role in study design, data collection and analysis, decision to publish, or preparation of the manuscript.

**Competing Interests:** The authors have declared that no competing interests exist.

\* E-mail: john.mccauley@nimr.mrc.ac.uk

‡ Current address: The Pirbright Institute, Pirbright Laboratory, Pirbright, Surrey, United Kingdom

## Introduction

Influenza A viruses have a significant impact on the human population as demonstrated not only by the mortality associated with infection, but also by their economic impact on health care systems around the world. In addition to seasonal epidemics, influenza A viruses have the potential to cause pandemics due to the circulation of novel subtypes against which the human hosts have little or no previous immunity. Such viruses are derived either by reassortment between human and animal influenza viruses, or the zoonotic transfer of viruses from animals [1].

The mechanisms of influenza pathogenesis involve an intricate interplay between virus virulence factors and host immune responses [1,2]. Inflammation is an essential component of the innate immune response controlling early viral replication [3]. However, excessive production of proinflammatory cytokines and infiltration of neutrophils and macrophages can impair lung function, ultimately leading to death of the host, such that inflammatory response has emerged as critical in the development of lung pathology during infection with highly virulent 1918 H1N1 and H5N1 viruses [4–7].

The nuclear factor- $\kappa$ B (NF- $\kappa$ B) family of transcription factors has long been recognised as a key regulator of the inflammatory response [8]. A p65-p50 heterodimer is the primary target of the canonical pathway, which is associated with the inhibitory protein I $\kappa$ B $\alpha$ . The canonical NF- $\kappa$ B pathway is triggered by the engagement of pattern recognition receptors (PRR) including toll like receptors (TLRs) and retinoic acid inducible gene (RIG-I), and pro-inflammatory cytokines such as tumor necrosis alpha (TNF $\alpha$ ) and interleukin-1 (IL-1). The recruitment of a set of adaptor proteins such as TIR-domain-containing adapter-inducing inter-

feron- $\beta$  (TRIF), myeloid differentiation primary response gene 88 (Myd88) and mitochondrial antiviral signaling protein (MAVS) culminates with the activation of the I $\kappa$ B kinase (IKK) complex and phosphorylation of I $\kappa$ B $\alpha$ , which results in its degradation and translocation of NF- $\kappa$ B dimers to the nucleus. Genes activated by NF- $\kappa$ B encode cytokines, chemokines, adhesion molecules and inducible nitric oxide synthase (iNOS) [9].

Several influenza proteins have been associated with countering the host response to infection: NS1 which modulates the interferon response amongst other responses of the cell [10]; the viral polymerase that binds to MAVS and inhibits IFN $\beta$  production [11,12]; a polypeptide designated PB1-F2, encoded by a second open reading frame of RNA segment 2 [13]; and a recently discovered polypeptide encoded in a ribosomal frame-shifted reading frame in RNA segment 3, PA-X [14].

The role of NS1 has been the subject of extensive investigation [10] but the role of PB1-F2 is much less well understood and little is yet known about the action of PA-X. It is known that PB1-F2 expression from the 1918 H1N1 virus enhances the lung inflammatory response in an animal model of secondary bacterial infection characterized by infiltration of immune cells and a significant increase in the levels of pro-inflammatory cytokines [15]. This was also observed for other isolates, indicating that the pro-inflammatory properties are a general feature of different PB1-F2 proteins [16].

The molecular mechanisms that mediate the induction of hypercytokinemia and immune cell infiltration by PB1-F2 are poorly understood, but a variety of biochemical properties have been assigned to it. PB1-F2 contains a mitochondrial targeting sequence interacting with the permeability transition pore complex resulting in cytochrome C release and the loss of the

mitochondrial membrane potential [13,17,18]. It can also form pores in lipid membranes [19,20]. Monocytic cells have been shown to be highly susceptible to PB1-F2 induced apoptosis [13,21] and this might be associated with the development of lung immunopathology [22]. However, the pro-apoptotic properties of PB1-F2 are strain specific [16,23]. The PB1-F2 polypeptide has been reported to increase virus polymerase activity as a result of the interaction between PB1 and PB1-F2 [24], but in both a strain- and cell-type specific manner [25]. PB1-F2 has also been linked to the interferon response. Mice infected with a virus encoding PB1-F2 with a N66S substitution exhibit a delayed type I IFN induction resulting in uncontrolled virus replication and a consequent increased inflammatory response [26]. A recent study showed that the deletion of PB1-F2 enhances IFN $\beta$  expression in epithelial cells [27]. The inhibition of type I IFN response by PB1-F2 was reported to occur at the level of MAVS [27–29] thereby impacting on the activation of interferon regulatory factor-3 (IRF-3) [27]. However, other authors found a significantly higher IFN $\beta$  expression in human respiratory epithelial cells infected with a wild type virus when compared to a PB1-F2 knockout virus. This increased IFN expression was dependent on the activation of NF- $\kappa$ B [30] and occurred during *in vivo* infection [31].

Given the limited understanding of the molecular mechanisms underlying the impact of PB1-F2 on the development of lung inflammatory response and the central role of NF- $\kappa$ B signalling pathways in the initiation and maintenance of inflammation, here we evaluated the consequences of expression of PB1-F2 proteins from different virus strains on cellular responses mediated by NF- $\kappa$ B. We show that PB1-F2 inhibits activation of the canonical NF- $\kappa$ B pathways in transfected cells. Importantly, PB1-F2 is able to interact with IKK $\beta$ , the key kinase for both PRR and pro-inflammatory cytokines signalling cascades, consistent with our observation that NF- $\kappa$ B binding to its cognate DNA is impaired in cells expressing PB1-F2.

## Materials and Methods

### Cells

African green monkey Vero cells (European Collection of Cell Cultures) were maintained in Dulbecco's modified Eagle medium (DMEM) supplemented with 10% foetal bovine serum (FBS), 50 U ml<sup>-1</sup> penicillin, 50  $\mu$ g ml<sup>-1</sup> streptomycin and 10 mM glutamine.

### Plasmids

The PB1-F2 open reading frames (ORFs) from A/Quail/Hong Kong/G1/97(H9N2) (Q/HK97), A/Puerto Rico/8/34(H1N1) (PR8), A/turkey/England/50-92/91(H5N1) (T/Eng) and A/turkey/Turkey/1/2005(H5N1) (T/Tur) were amplified from viral RNA using the OneStep RT-PCR Kit (Qiagen) and cloned into pcDNA4 (Invitrogen) in frame with the carboxy-terminal myc tag. Similarly, DNA fragments encoding amino-terminal (residues 1–57) and carboxy-terminal (residues 58–STOP) PB1-F2 peptides from the same viruses were amplified and cloned into pcDNA4.

The reporter plasmid for NF- $\kappa$ B [p(PRDI)5tk $\Delta$ (–39)lucifer] [32] and expression vectors for TRIF, MAVS, IKK $\alpha$  and IKK $\beta$  were kindly provided by Prof. S. Goodbourn (St. George's, University of London); pcDNA3 harbouring the human p65 gene was a kind gift of Dr. S. Ley (NIMR); pUNO containing the human MyD88 ORF was from Invitrogen and the pSV- $\beta$  plasmid containing a  $\beta$ -galactosidase gene under control of the SV40 early promoter was from Promega.

### GST Recombinant Proteins

The p65 transcription activation domain (residues 354–551) was amplified by PCR using pCDNA3-p65 as a template, cloned into the pGEX4T-1 (GE Healthcare) plasmid and used to transform competent *Escherichia coli* strain BL21 (Stratagene); the expression of the recombinant p65 was induced with 1 mM IPTG for 2 hours. GST-p65 was purified using Glutathione Sepharose 4B (GE Healthcare) following the manufacturers instructions. GST- I $\kappa$ B $\alpha$  (residues 1–54) was kindly provided by Dr. K. Ritinger (NIMR).

### Luciferase Reporter Assay

Vero cells ( $1 \times 10^5$  cells/well, in a 24 well plate) were co-transfected with 100 ng of the NF- $\kappa$ B reporter plasmid, 25 ng of pSV- $\beta$  and 300 ng of one of the pcDNA4-PB1-F2 plasmids or the empty plasmid, according to the Lipofectamine 2000 protocol (Invitrogen). Forty eight hours post-transfection, the cells were stimulated with 25  $\mu$ g ml<sup>-1</sup> Poly (I:C) (Sigma), 20 ng ml<sup>-1</sup> TNF $\alpha$  (Peprotech), 1  $\mu$ g ml<sup>-1</sup> LPS (Sigma) or 10 ng ml<sup>-1</sup> IL-1 $\beta$  (Peprotech) for five hours. After stimulation, the cells were lysed with 0.1 M potassium phosphate pH 7.8, 1% Triton X-100, 1 mM DTT, 2 mM EDTA, and the luciferase activity was measured using the luciferase assay system (Promega) according to the manufacturer's protocol. Transfection efficiency was standardised against  $\beta$ -galactosidase activity measured using Galacton-Plus (Applied Biosystems).

In an alternative assay, cells were co-transfected with 100 ng of reporter plasmid, 25 ng of pSV- $\beta$ , the indicated amounts of plasmids expressing the different components of the NF- $\kappa$ B pathway and 300 ng of the PB1-F2 constructs. Forty eight hours post transfection, the luciferase and galactosidase activities were measured as above.

### Yeast Two-hybrid Assay

Q/HK97 PB1-F2 ORF was excised from the pcDNA4 expression vector and subcloned into the pGADT7 and pGBKT7 plasmids in frame with the GAL4 activation domain (AD) and GAL4 binding domain (BD) respectively. Similarly, IKK $\alpha$  and IKK $\beta$  were subcloned into the pGADT7 plasmid in frame with the GAL4 activation domain.

*Saccharomyces cerevisiae* strain AH109 cells were co-transformed with different combinations of pGADT7 and pGBKT7 constructs, using lithium acetate as described in the Clontech Yeastmaker<sup>TM</sup> Yeast Transformation System 2 user manual. Double transformants were selected by growth at 30°C on synthetic dropout (SD) medium lacking leucine and tryptophan (SD/–Leu/–Trp) and then streaked on SD/–Leu/–Trp/–His +10 mM 3-Amino-1,2,4-triazole (3-AT) plates. The colonies surviving this selection were replica plated on medium containing 40  $\mu$ g ml<sup>-1</sup> X- $\alpha$ -gal (Clontech).

### Immunoprecipitation

Vero cells ( $2.4 \times 10^6$  cells, 100 mm plate) were transfected with 12  $\mu$ g of one of the pcDNA4-PB1-F2 plasmids or the empty plasmid and 12  $\mu$ g of Flag tagged pcDNA3-IKK $\beta$ . Forty-eight hours post-transfection, the cells were washed with phosphate buffered saline (PBS) and lysed with 500  $\mu$ l of cell lysis buffer (Cell Signaling Technology) supplemented with a protease inhibitor cocktail (Sigma). Cellular extracts were centrifuged for 10 min at 13000 $\times$ g and supernatants were incubated overnight at 4°C with protein G Dynabeads (Invitrogen) previously coated with monoclonal mouse anti-myc antibody (Sigma, M4439). The Dynabeads were then washed 4 times with PBS +0.02% Tween 20 and finally resuspended in 1 $\times$  SDS loading buffer (0.06 M Tris-HCl pH 6.8,

1.7% SDS, 6% glycerol, 0.8%  $\beta$ -mercaptoethanol, 0.002% bromophenol blue). After incubation at 95°C for 10 min, supernatants were resolved by sodium dodecyl sulfate - polyacrylamide gel electrophoresis (SDS-PAGE) and proteins were transferred to a polyvinylidene difluoride (PVDF) membrane. The immunoblots were blocked for two hours at room temperature with Tris Buffered Saline pH 7.4 (TBS, Fisher Scientific) +0.1% Tween 20 containing 5% non-fat milk and incubated overnight at 4°C with monoclonal mouse anti-myc and rabbit anti-Flag (Cell Signaling Technology, 2368) both diluted 1:1000 in TBS +0.1% Tween 20 containing 5% bovine serum albumin (BSA). After washing, the membrane was probed with goat anti-rabbit Dylight 800 (Thermo Scientific, 35571) and goat anti-mouse Alexa Fluor 680 (Invitrogen, A21058) diluted 1:2000 and analysed on the Odyssey Infrared Imaging System (LI-COR).

### Immunoblotting

Vero cells ( $5 \times 10^5$  cells/well, 6 well plate) were transfected with 3  $\mu$ g of one of the pcDNA4-PB1-F2 plasmids or the empty plasmid. Forty-eight hours post-transfection, the cells were washed with PBS and lysed directly in 100  $\mu$ l 1 $\times$ SDS loading buffer. Lysates were run on a SDS-PAGE gel, transferred to a PVDF membrane and non-specific binding was blocked as above. The membranes were incubated overnight at 4°C with monoclonal mouse anti-myc antibody diluted 1:1000 in TBS+0.1% Tween 20+5% BSA. After washing, the membrane was probed with goat anti-mouse Alexa Fluor 680 diluted 1:2000 and analysed as described for immunoprecipitation.

### Immunofluorescence

Vero cells ( $1 \times 10^5$ ) on glass coverslips were transfected with 300 ng of one of the pcDNA4-PB1-F2 plasmids or the empty plasmid and 300 ng of pcDNA3-IKK $\beta$ . Forty-eight hours post-transfection, the cells were fixed with 4% formaldehyde, permeabilised with PBS +0.2% Triton X-100 and blocked with PBS +1% BSA. The samples were then incubated for 1 hour with monoclonal mouse anti-myc antibody diluted 1:100 and rabbit anti-Flag antibody, diluted 1:500 in blocking buffer, washed with PBS, and incubated for 1 hour with anti-mouse Alexa Fluor 594 and anti-rabbit Alexa Fluor 488 secondary antibodies (Invitrogen) diluted 1:500 in blocking buffer, all at room temperature. The coverslips were mounted in ProLong antifade medium (Invitrogen) and examined using a confocal microscope (Leica DMIRE2).

For assessment of p65 nuclear translocation, Vero cells were transfected with 400 ng of pcDNA4-PB1-F2Q/HK97 with Lipofectamine 2000. Forty-eight hours post-transfection, the cells were stimulated with 1  $\mu$ g ml<sup>-1</sup> LPS+800 ng ml<sup>-1</sup> CD14 (R&D Systems) for 1 hour. Cells were then washed with PBS and fixed with 4% formaldehyde for 20 minutes. After permeabilisation, the cells were blocked and incubated for 1 hour with monoclonal mouse anti-myc antibody diluted 1:100 and rabbit anti-p65 antibody (Santa Cruz Biotechnology, SC-372) diluted 1:50. Coverslips were then washed with PBS, incubated with secondary antibodies and mounted as described above.

### Kinase Assay

Vero cells were transfected with pcDNA4-PB1-F2Q/HK97 or empty plasmid and pcDNA3-IKK $\beta$  as described for immunoprecipitation. Extracts were prepared using cell lysis buffer and IKK $\beta$  was immunoprecipitated by incubating the lysates for 2 hours at 4°C with protein G Dynabeads coated with rabbit anti-Flag antibody. After extensive washing with cell lysis buffer and kinase buffer (20 mM Hepes pH 7.5, 10 mM MgCl<sub>2</sub>, 2 mM DTT, 1 mM Na<sub>3</sub>VO<sub>4</sub>, 2 mM NaF, 20 mM  $\beta$ -glycerophosphate, sup-

plemented with protease inhibitor cocktail), the beads were resuspended in 20  $\mu$ l kinase buffer containing 1  $\mu$ M ATP and 2  $\mu$ g of GST-IkB $\alpha$  or GST-p65. Finally, 0.0925 MBq <sup>32</sup>P ATP (originally 111 TBq/mmol) was added to each tube and the mix was incubated at 30°C for 5, 10 or 20 min. The reactions were stopped by adding 4  $\mu$ l 6 $\times$  SDS loading buffer and incubating at 95°C for 10 min. Samples were separated by SDS-PAGE and the phosphorylation of the substrates was assessed by autoradiography.

### Electrophoretic Mobility Shift Assay (EMSA)

Vero cells expressing PB1-F2Q/HK97 were selected using the MACSelect<sup>TM</sup> K<sup>k</sup> System (Miltenyi Biotec). Briefly, Vero cells ( $2.4 \times 10^6$  cells, 100 mm plate) were transfected with 22.5  $\mu$ g of pcDNA4-PB1-F2Q/HK97 or empty plasmid and 2.25  $\mu$ g of the pMACS K<sup>k</sup>.II construct. Forty eight hours post-transfection, the cells were trypsinized and incubated with MACSelect microbeads coated with anti-K<sup>k</sup> antibody. Cells bound to the microbeads were positively selected with the use of a magnetic field and  $1 \times 10^6$  cells were seeded per 60 mm plate. After adhering to the plate (5 hours), cells were treated with 1  $\mu$ g ml<sup>-1</sup> LPS +800 ng ml<sup>-1</sup> CD14 for one hour. Next, the cells were washed with PBS and nuclear extracts were prepared by lysing the cells in 10 mM Hepes pH 7.5, 1.5 mM MgCl<sub>2</sub>, 10 mM KCl, 0.125% NP-40 and extracting nuclear proteins with 20 mM Hepes pH 7.5, 25% glycerol, 0.42 M NaCl, 1.5 mM MgCl<sub>2</sub>, 0.2 mM EDTA.

Protein-DNA complexes were formed by incubating 10  $\mu$ g of nuclear extract for 20 minutes at room temperature with a NF- $\kappa$ B (AGTTGAGGGGACTTTCCAGGC) 3' end biotinylated probe. EMSA was performed with the LightShift Chemiluminescent EMSA Kit (Thermo Scientific) according to the manufacturer's protocol.

### Statistical Analysis

Statistical analysis was performed using GraphPad Prism6 software. Significant differences between groups were determined using one-way ANOVA followed by Dunnett's multiple comparison test.

## Results

### PB1-F2 Varies in its Ability to Modulate NF- $\kappa$ B Signalling

To evaluate the impact of PB1-F2 expression on NF- $\kappa$ B dependent signalling pathways, PB1-F2 ORFs from the prototype laboratory strain PR8, from a H9N2 virus isolated from quail (Q/HK97), and those from two H5N1 viruses, both from turkeys (T/Eng and T/Tur) but isolated 14 years apart and showing significant sequence diversity (Fig. S1) were cloned into a eukaryotic expression vector in frame with a myc tag. Each of the PB1-F2 constructs were transfected into a range of different cell lines. PB1-F2 was shown to be consistently detected by both Western blotting and immunofluorescence in Vero cells but inconsistently in other mammalian cell lines examined (data not shown), so Vero cells were chosen for this study.

A reporter plasmid containing a luciferase gene under the control of the PRDII element of the IFN $\beta$  promoter, responsive to NF- $\kappa$ B activation [32], was used to quantify the response of cells to both PRR and pro-inflammatory cytokine activated pathways (Fig. 1A). Luciferase activity was strongly induced after the stimulation of empty plasmid transfected cells with Poly I:C, LPS, TNF $\alpha$  and IL-1 $\beta$ . The induction of the reporter was reduced in cells transfected with PB1-F2 plasmids derived from the avian influenza viruses indicating that PB1-F2 is able to inhibit NF- $\kappa$ B mediated signalling. In contrast to the results for PB1-F2 from

avian viruses, no significant decreases in luciferase activities were observed in cells expressing PB1-F2 from PR8, the human prototype virus. The inability of PB1-F2 from PR8 to inhibit NF- $\kappa$ B signalling cannot be ascribed to lower level of protein expression, since the latter was comparable to PB1-F2 from Q/HK97 and T/Eng (Fig. 1C). Therefore, our results indicate that PB1-F2 from different viruses can vary in its ability to modulate NF- $\kappa$ B in transfected cells.

To extend these results, the ability of PB1-F2 to modulate NF- $\kappa$ B activity induced by the overexpression of key components of signalling pathways initiated by PRR engagement was also examined (Fig. 1B). Overexpression of TRIF, Myd88 or MAVS increased luciferase activity when compared to control cells but was reduced when co-expressed with PB1-F2 from Q/HK97; co-expression of PB1-F2 from T/Eng caused a reduction of luciferase activity stimulated by TRIF, but no significant reduction in luciferase activity was seen with PB1-F2 from T/Tur. PB1-F2 from T/Tur showed lower levels of protein expression (Fig. 1C) compared with the levels seen for the other proteins, which may be associated with its failure to inhibit the induction of the reporter in the assay based on over-expression of signalling intermediates. As in the stimulation assays, no reductions were observed in cells co-expressing PB1-F2 from PR8.

Importantly, PB1-F2 showed no inhibition of signalling when reporters dependent on the activation of the transcription factors Signal Transducer and Activator of Transcription STAT1 and STAT2 (gamma activated site and interferon stimulated response element) were tested (Fig. S2), indicating that the effect seen was not due to a general impairment of cell signalling pathways.

### PB1-F2 Interacts with IKK $\beta$

Activation of the NF- $\kappa$ B canonical pathway relies on the activation of the IKK complex and consequent phosphorylation of I $\kappa$ B proteins and translocation of NF- $\kappa$ B molecules to the nucleus. Since several viral proteins have evolved sequence and structural homologies to host proteins in order to modify critical pathways of the immune response, we searched for sequence homology between PB1-F2 and IKK $\gamma$ , IKK $\alpha$ , IKK $\beta$ , I $\kappa$ B $\alpha$  and the different members of the NF- $\kappa$ B family of transcription factors. The observation that PB1-F2 has some sequence similarity to both human and chicken IKK $\alpha$  (Fig. 2A) and that in mammalian cells IKK $\alpha$  and IKK $\beta$  form homo and heterodimers associated, or not, with IKK $\gamma$  prompted us to test whether the PB1-F2 protein is able to directly interact with IKK $\alpha$  and/or IKK $\beta$ . First, a yeast two-hybrid assay was carried out. Yeast expression vectors with PB1-F2 from Q/HK97 fused to either the GAL4 AD or the GAL4 BD and IKK $\alpha$ /IKK $\beta$  fused to the GAL4 AD were produced and transformed into yeast cells in different combinations. Yeast cells co-transformed with AD-PB1-F2 plus BD-PB1-F2, used to show that the PB1-F2 constructs were able to dimerise [24], survived selection in medium lacking histidine and induced galactosidase activity (Fig. 2B). Similarly, the cells transformed with BD-PB1-F2 plus AD-IKK $\beta$  were able to grow in selective medium and express galactosidase, in contrast BD-PB1-F2 plus AD-IKK $\alpha$  did not grow. These results indicate that PB1-F2 interacted with IKK $\beta$  but not with IKK $\alpha$ .

The interaction between PB1-F2 and IKK $\beta$  in mammalian cells was then tested following transfection of expression plasmids and immunoprecipitation (Fig. 2C). To assess if the interaction with IKK $\beta$  is a general feature of PB1-F2, the proteins derived from the viruses PR8, T/Eng and T/Tur were also included in this experiment. Immunoprecipitation of PB1-F2 using an anti-myc tag antibody resulted in the co-precipitation of IKK $\beta$  with each PB1-F2 tested, suggesting that the different abilities to modulate

NF- $\kappa$ B signalling pathways are not directly related to their ability to interact with IKK $\beta$ . Instead, the amount of co-precipitated kinase seemed to be proportional to the amount of PB1-F2 present in the precipitate. PB1-F2 was not detected by Western blot in the whole cell input (4%), indicating low levels of protein expression.

Confocal microscopy of cells transfected with the different PB1-F2 constructs and IKK $\beta$  showed areas of protein co-localisation (Fig. 2D), further supporting the results obtained in the yeast two hybrid and co-immunoprecipitation studies.

### PB1-F2 Inhibits NF- $\kappa$ B Activation Induced by IKK $\beta$ Overexpression

To investigate whether PB1-F2 interaction with IKK $\beta$  would result in impairment of NF- $\kappa$ B dependent transcription induced by IKK $\beta$ , cells co-transfected with IKK $\beta$  and the empty plasmid or the different PB1-F2 constructs were evaluated by luciferase assay (Fig. 3A). Overexpression of IKK $\beta$  resulted in robust activation of the PRDII reporter in cells transfected with the empty plasmid. However, in cells co-expressing the various PB1-F2s this activation was much lower, indicating that PB1-F2 proteins from each of the influenza viruses examined inhibit NF- $\kappa$ B activation induced by IKK $\beta$  overexpression. This result raises the possibility that the absence of an impact of PB1-F2 PR8 in stimulated cells (Fig. 1) could be a consequence of additional effects of this protein within these signalling pathways.

Having established that PB1-F2 inhibits the ability of IKK $\beta$  to induce NF- $\kappa$ B dependent transcription, the effect of PB1-F2 in cells overexpressing p65, the central transcription factor of the canonical NF- $\kappa$ B pathway, was evaluated (Fig. 3B). In cells transfected with the empty plasmid there was a strong induction of luciferase activity, which was significantly reduced in cells co-expressing PB1-F2 Q/HK97, while the other 3 PB1-F2 proteins induced varied effects.

### Full Length PB1-F2 is Necessary for Inhibition of NF- $\kappa$ B Dependent Signalling

Most avian isolates encode an intact PB1-F2, several swine isolates contain truncated forms of the protein (premature stops after 11, 25 and 34 codons), human seasonal A (H1N1) viruses isolated between 1950 and early 2009 carry a 57 amino acid truncated form [33] and the recent A(H1N1)pdm09 virus encodes only the first 11 amino acids of the protein. Therefore, we assessed whether an N-terminal truncated form of the protein (residues 1 to 57) or its C-terminal portion (residues 58 to the protein C terminus) are sufficient to inhibit NF- $\kappa$ B dependent signalling. The nucleotide sequences encoding these PB1-F2 fragments were cloned into the same expression vector as the full length protein and their expression in transfected cells was confirmed by immunofluorescence (Fig. S3). Subsequently, they were examined using the NF- $\kappa$ B luciferase reporter assay in cells overexpressing IKK $\beta$ . Cells transfected with the full length PB1-F2 proteins were tested in parallel for inhibition of NF- $\kappa$ B signalling (only PB1-F2 Q/HK97 is shown). Both the N-terminal portion (Fig. 4A) and C-portion (Fig. 4B) of PB1-F2 were unable to inhibit the induction of the reporter, implying that the full length protein is necessary to inhibit NF- $\kappa$ B dependent signalling.

### NF- $\kappa$ B Binding to DNA is Impaired in Cells Expressing PB1-F2

In addition to its role in I $\kappa$ B $\alpha$  phosphorylation, IKK $\beta$  phosphorylates p65 at Ser536 [34,35], an event necessary for optimal transcriptional activity [35], and at Ser468 [36], which has been associated with p65 ubiquitination and subsequent degrada-

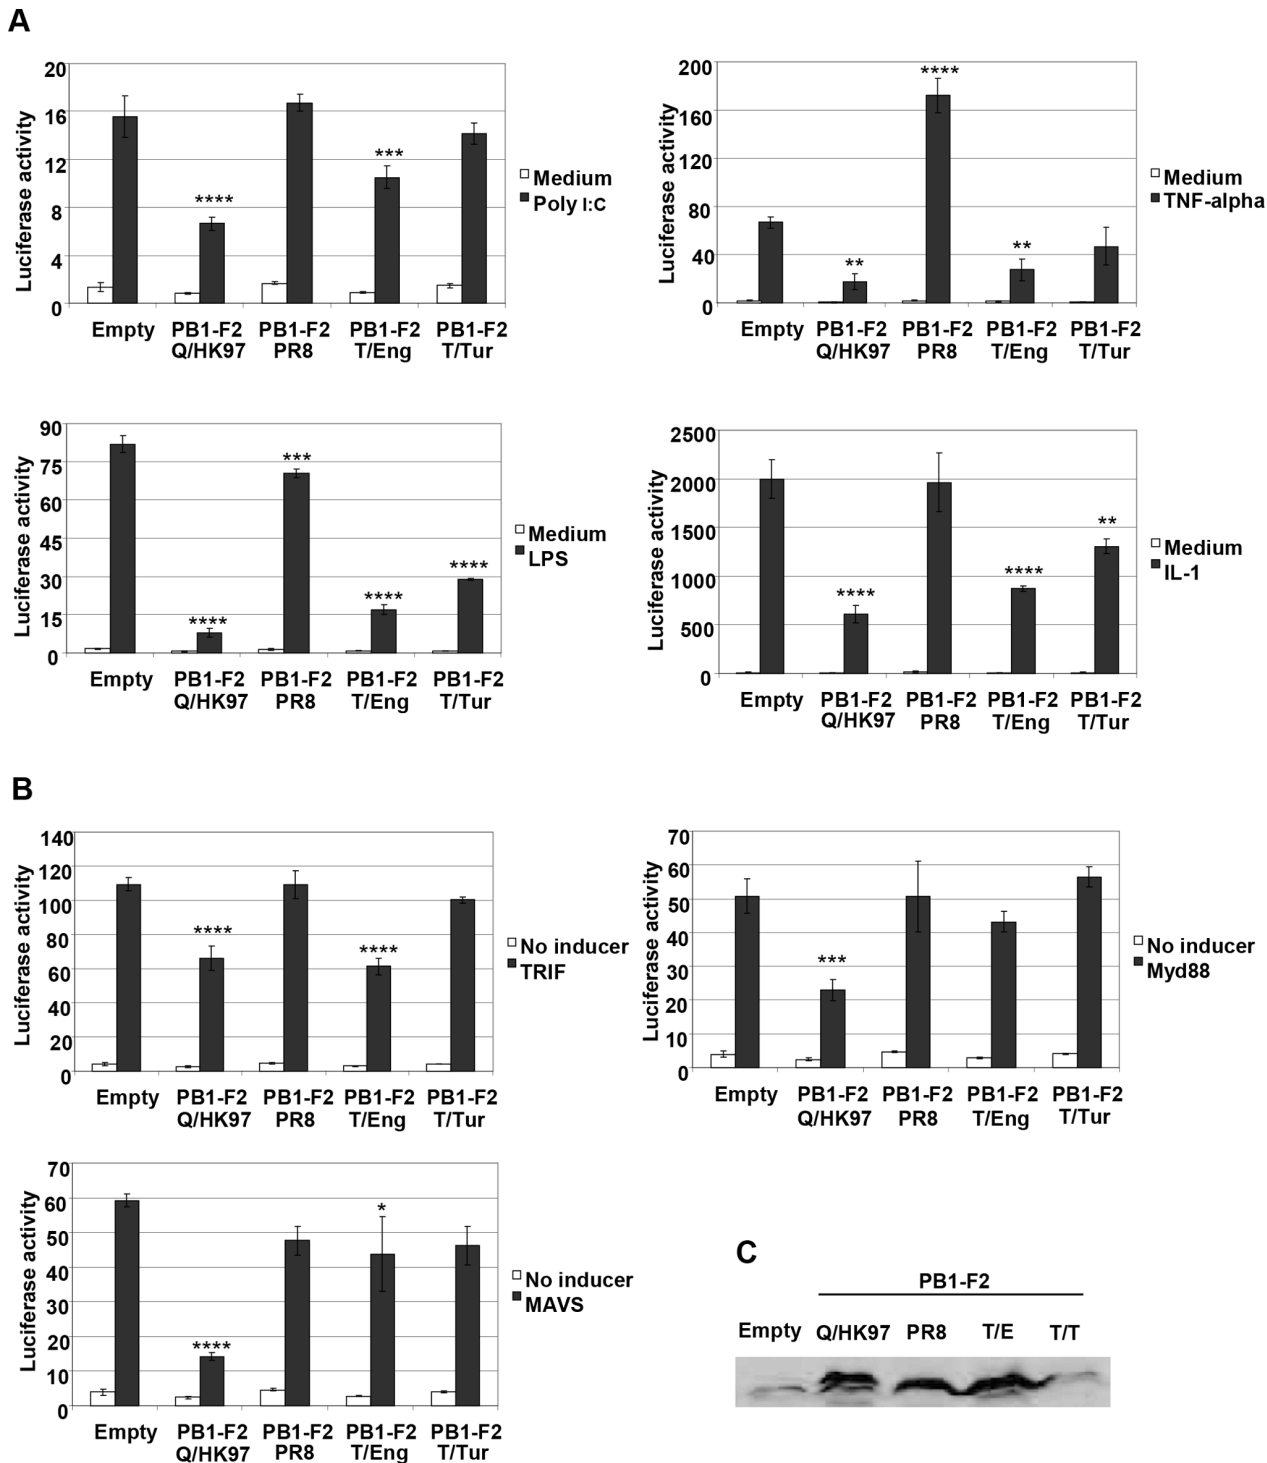

**Figure 1. PB1-F2 modulates NF- $\kappa$ B signaling.** A) Vero cells were co-transfected with the NF- $\kappa$ B reporter and either each of the different PB1-F2 expression vectors or the empty pcDNA4 plasmid along with the  $\beta$ -galactosidase control plasmid. Forty eight hours post-transfection, the cells were either induced or not induced with  $25 \mu\text{g ml}^{-1}$  Poly (I:C),  $20 \text{ ng ml}^{-1}$  TNF $\alpha$ ,  $1 \mu\text{g ml}^{-1}$  LPS or  $10 \text{ ng ml}^{-1}$  IL-1 $\beta$  for five hours, cell extracts were made and the luciferase and galactosidase activities were measured. B) Vero cells were co-transfected with the NF- $\kappa$ B reporter and either each of the different PB1-F2 expression vectors or the empty pcDNA4 plasmid, the  $\beta$ -galactosidase control plasmid and 100 ng of TRIF, Myd88 or MAVS expressing vectors. Forty eight hours post-transfection, the cells were lysed and the luciferase and galactosidase activities were measured. Data are representative of at least 3 independent experiments. Bars represent average values and standard deviations of firefly luciferase activities from triplicate samples normalized to the expression of galactosidase. Asterisks indicate results significantly different from control empty vector (one-way ANOVA followed by Dunnett's test; \*,  $P \leq 0.05$ ; \*\*,  $P \leq 0.01$ ; \*\*\*,  $P \leq 0.001$ ; \*\*\*\*,  $P \leq 0.0001$ ). C) Vero cells in a 6 well plate, were transfected with  $3 \mu\text{g}$  of each of the different PB1-F2 constructs or the empty pcDNA4 plasmid. Forty eight hours post-transfection, the cells were lysed and PB1-F2 expression was detected by immunoblotting using a monoclonal mouse anti-myc antibody.  
doi:10.1371/journal.pone.0063852.g001

## A

```

Human  IKK $\alpha$   LVVEPMENWLQLMLNWDPPQQRGGPVDLTL-KQPRCFVLMDHILNLK 311
Chicken IKK $\alpha$   LIVEPMESWLQLMLNWDPEQRGGGLDPET-NSPKCFLLMDHILNLK 325
PB1-F2 Q/HK97 MEQEODTPWTQSTEHINIQKKGGGQQTQRPPEHPNSTLLMDHYLKT 46
          : * * * : : : : * : : * . : * * * * * :
          : * * * : : : : * : : * . : * * * * * :

Human  IKK $\alpha$   IVHILNMTSAKIISFLLPPDESLSLQSRIERETGINTGSQELLS 356
Chicken IKK $\alpha$   IVHILNMTSAKIVSFLHPEESLHFLQNRIBSETGISTGNQELLL 370
PB1-F2 Q/HK97 SRAGMHKQIVYWKQWLSLKNPTQGLKTHVLKRWKLSS-KREWIS 90
          : : . . : * : : * : : : . : : : : * :
  
```

## B

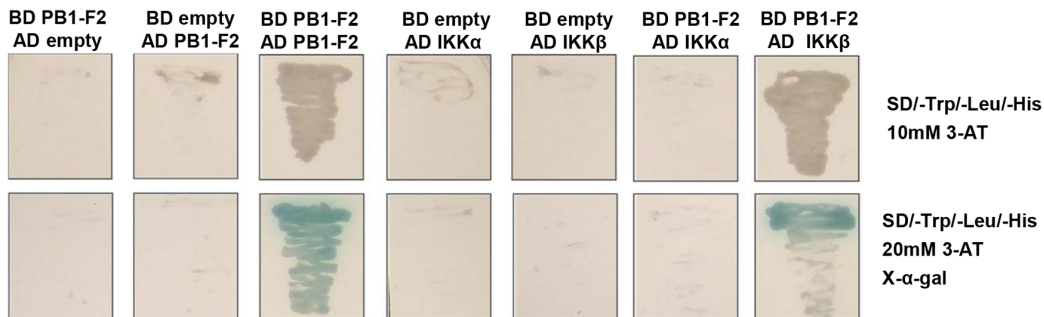

## C

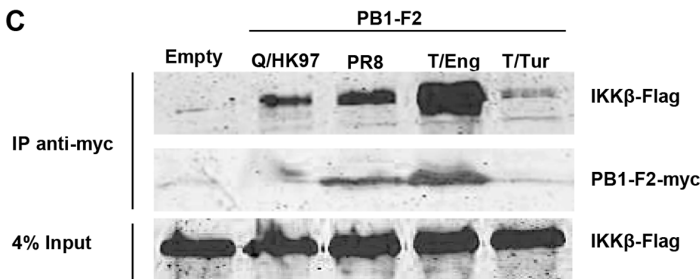

## D

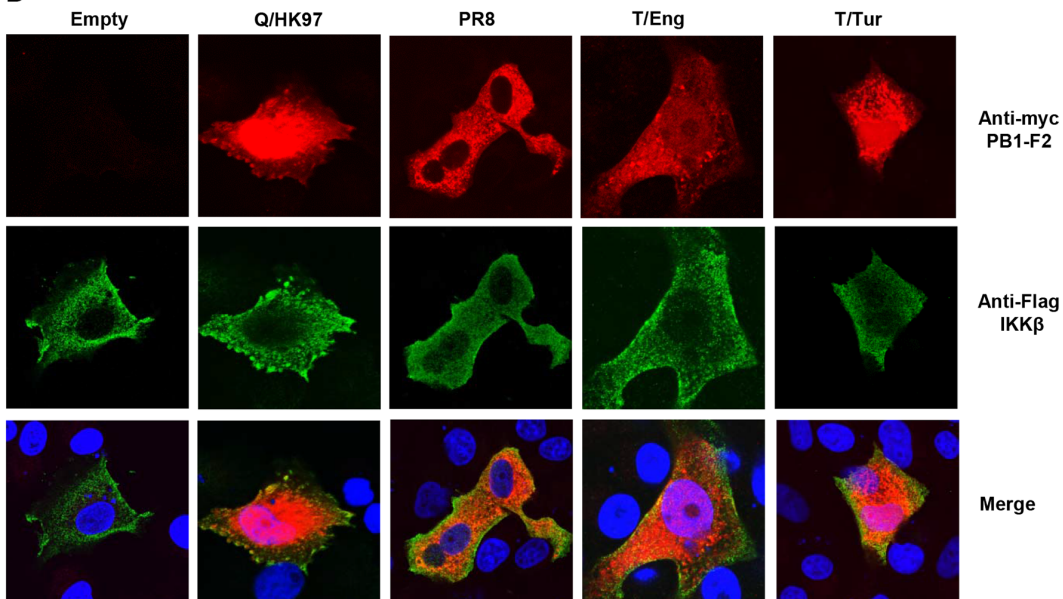

**Figure 2. PB1-F2 has sequence similarity with IKK $\alpha$  and interacts with IKK $\beta$ .** A) Alignment of PB1-F2 Q/HK97 protein sequence with human and chicken IKK $\alpha$  using ClustalW (\*denotes identical residues, : denotes conservative substitutions and. denotes semi-conservative substitutions). The grey shading denotes the conserved residues in PB1-F2 from PR8, T/Eng and T/Tur. B) Yeast cells were independently transformed with different combinations of pGADT7 (AD) and pGBKT7 (BD) constructs and plated on selective medium. Yeast cells co-transformed with BD PB1-F2 and AD PB1-F2 were used as a positive control for protein-protein interaction. C) Vero cells were transfected with the indicated constructs and forty eight hours

after transfection, protein complexes were immunoprecipitated from cellular lysates using a monoclonal anti-myc antibody. Proteins in the immunoprecipitates and in the whole cell lysates (4% input) were evaluated by Western blot using anti-Flag and anti-myc antibodies. D) Vero cells were transfected with 300 ng of the different PB1-F2 expressing vectors and 300 ng of pcDNA3-IKK $\beta$ . The cellular localisation of the proteins was analyzed by confocal microscopy using anti-myc (PB1-F2, red) and anti-Flag (IKK $\beta$ , green) antibodies.  
doi:10.1371/journal.pone.0063852.g002

tion [37,38]. To characterize better the molecular mechanism(s) employed by PB1-F2 to modulate IKK $\beta$  function, the catalytic activity of IKK $\beta$  was examined using an *in vitro* kinase assay in the presence or absence of PB1-F2 Q/HK97 with recombinant GST-IkB $\alpha$  and GST-p65 as substrates. IKK $\beta$  was immunoprecipitated from cells transfected with empty plasmid or the PB1-F2 construct and the phosphorylation status of IkB $\alpha$  and p65 was evaluated after addition of  $^{32}$ P ATP and incubation for different times (Fig. 5A). Surprisingly, IKK $\beta$  immunoprecipitated from cells expressing PB1-F2 showed increased catalytic activity, demonstrated by the enhancement of phosphorylation of both IkB $\alpha$  and p65. Furthermore, IKK $\beta$  self-phosphorylation was also increased. Importantly, the same amounts of IKK $\beta$ -Flag were detected in the immunoprecipitates from empty and PB1-F2 transfected cells (Fig. 5A), indicating that the observed differences did not result from different quantities of kinase present in the reaction.

Phosphorylation of IkB $\alpha$  results in its ubiquitination and degradation, thus releasing the inhibitory effects on p65 and favoring the nuclear localisation of the p65-p50 heterodimer. To test if PB1-F2 inhibits this fundamental step of NF- $\kappa$ B signalling, the cellular localisation of endogenous p65 was evaluated by immunofluorescence. In untreated cells, p65 was detected both in the cytoplasm and in the nucleus (Fig. 5B). As expected, stimulation of cells with LPS plus soluble CD14 [39] resulted in an obvious nuclear accumulation of p65. Importantly, the same increase in p65 nuclear staining was observed in cells expressing PB1-F2 Q/HK97, indicating that PB1-F2 does not inhibit the nuclear translocation of the p65-p50 heterodimer.

In the nucleus NF- $\kappa$ B dimers bind to promoters containing  $\kappa$ B consensus sequences. The impact of PB1-F2 on NF- $\kappa$ B binding to its cognate DNA, analyzed by EMSA, was evaluated in Vero cells enriched for the expression of PB1-F2 using the MACSelect<sup>TM</sup> K<sup>k</sup>

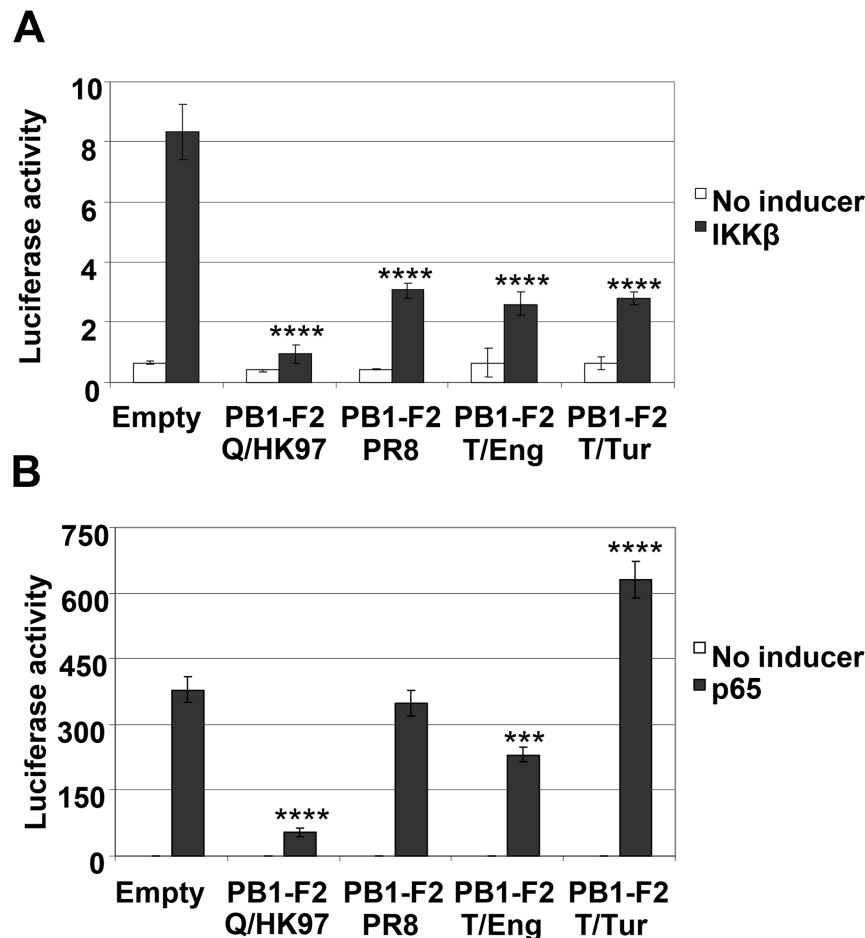

**Figure 3. PB1-F2 proteins from different influenza isolates inhibit NF- $\kappa$ B activation induced by IKK $\beta$  overexpression.** Vero cells were co-transfected with the NF- $\kappa$ B reporter and either each of the different PB1-F2 expression vectors or the empty pcDNA4 plasmid, the  $\beta$ -galactosidase control plasmid and 100 ng of pcDNA3-IKK $\beta$  (A) or 5 ng of pcDNA3-p65 (B). Forty eight hours post-transfection, the cells were lysed and the luciferase and galactosidase activities were measured. Data are representative of at least 3 independent experiments. Bars represent average values and standard deviations of firefly luciferase activities from triplicate samples normalized to the expression of galactosidase. Asterisks indicate results significantly different from control empty vector (one-way ANOVA followed by Dunnett's test; \*\*\*,  $P \leq 0.001$ ; \*\*\*\*,  $P \leq 0.0001$ ).  
doi:10.1371/journal.pone.0063852.g003

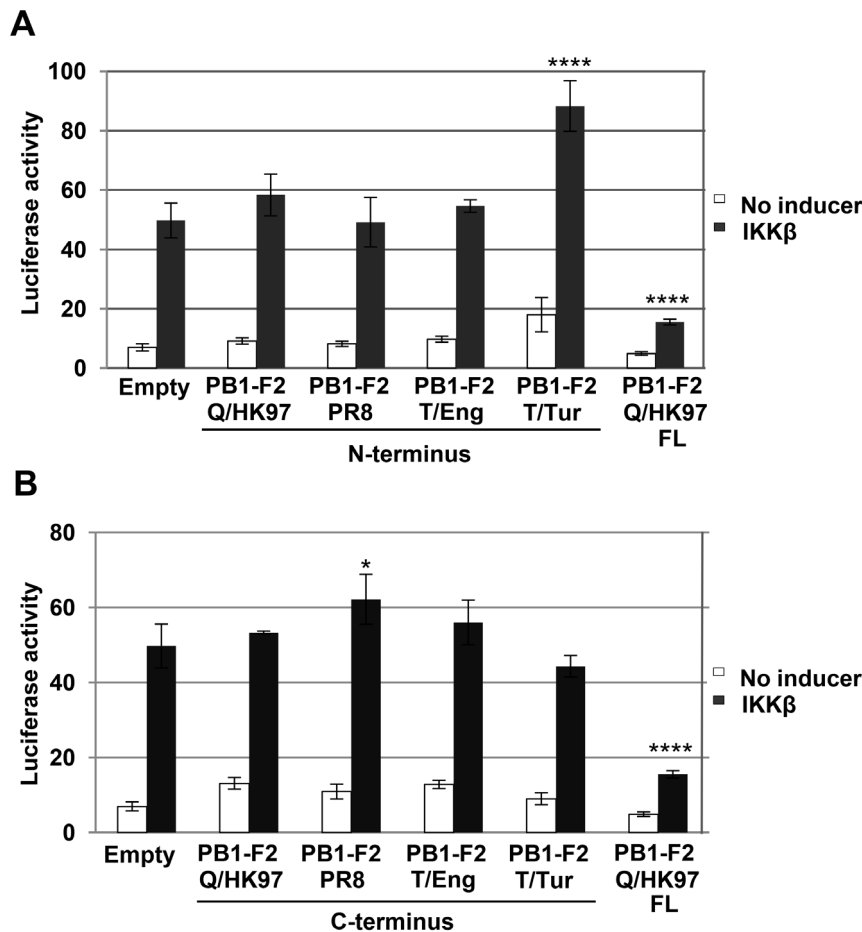

**Figure 4. The full length PB1-F2 protein is necessary to inhibit NF- $\kappa$ B signaling.** Vero cells were co-transfected with the NF- $\kappa$ B reporter, the different N-terminal (A) or C-terminal (B) PB1-F2 constructs or empty pcDNA4, the  $\beta$ -galactosidase control plasmid and 100 ng of pcDNA3-IKK $\beta$ . Cells transfected with the full length (FL) PB1-F2 Q/HK97 expression vector were used as a positive control for inhibition of NF- $\kappa$ B signalling. Forty eight hours post-transfection, the cells were lysed and the luciferase and galactosidase activities were measured. Data are representative of at least 3 independent experiments. Bars represent average values and standard deviations of firefly luciferase activities from triplicate samples normalized to the expression of galactosidase. Asterisks indicate results significantly different from control empty vector (one-way ANOVA followed by Dunnett's test; \*,  $P \leq 0.05$ ; \*\*\*\*,  $P \leq 0.0001$ ). doi:10.1371/journal.pone.0063852.g004

System; cells transfected with the empty plasmid were treated in parallel. Cells were stimulated with LPS plus soluble CD14, nuclear extracts were prepared and incubated with a NF- $\kappa$ B probe. A shift of the probe was seen when extracts from cells transfected with the empty plasmid were used (Fig. 5C). This shift was not observed in cells expressing PB1-F2, indicating that binding of NF- $\kappa$ B transcription factors to DNA is impaired in these cells.

## Discussion

NF- $\kappa$ B signalling plays a central role in host defences against invading pathogens not only by initiating the innate immune response but also by orchestrating the development of acquired immunity. Being directly activated by PRR engagement, NF- $\kappa$ B induced genes are among the first to be transcribed in response to infection, and are a target for subversion of the host immunity by bacterial and viral pathogens. Several viral proteins have evolved to modify NF- $\kappa$ B signalling, impacting at different levels of its activation [40]; we submit that PB1-F2 might be included in this group of viral proteins, being able to modulate NF- $\kappa$ B activation

and interact with IKK $\beta$ , the critical kinase of the canonical pathway.

PB1-F2 has a clear effect on virus pathogenesis that might correlate with an ability to alter NF- $\kappa$ B signalling. It was recently reported that infection of murine monocytic cells with an influenza virus lacking PB1-F2 ( $\Delta$ PB1-F2) induced higher levels of IL-6 and IL-1 $\beta$  than with the wt virus [41]. Similar results have been obtained using ferret blood derived macrophages, where the absence of PB1-F2 resulted in significantly increased expression of IL-6, IL-1 $\beta$  and IL-8 [42] - all cytokines expressed under the control of NF- $\kappa$ B and potentially susceptible to modulation through PB1-F2.

PB1-F2 has been shown to influence the severity of secondary bacterial infection [15] and IFN $\gamma$  has been shown to inhibit anti-bacterial defense during recovery from influenza virus infection [43]. These observations might be linked if PB1-F2 interacts with IKK $\beta$  since IKK $\beta$  suppresses IFN $\gamma$  signalling in macrophages through inhibition of STAT1 activation [44]. Furthermore, a link between the effects of PB1-F2 on apoptosis in macrophages [13,21] and IKK $\beta$  is also possible since activation of NF- $\kappa$ B



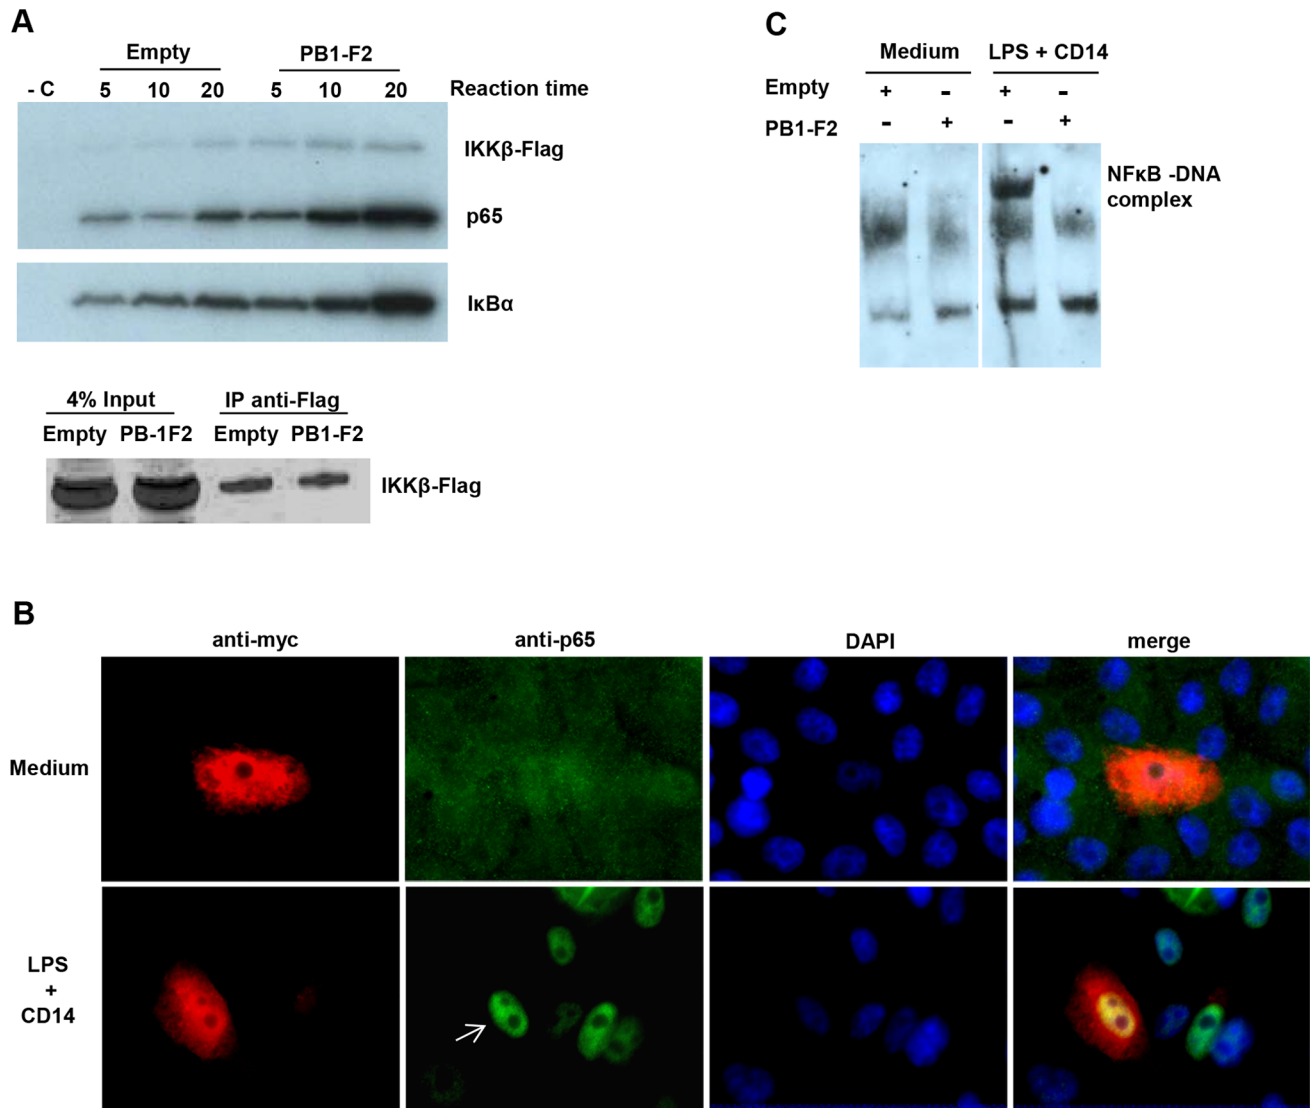

**Figure 5. PB1-F2 increases IKK $\beta$  kinase activity but inhibits NF- $\kappa$ B binding to DNA.** A) Vero cells were transfected with empty pcDNA4 or pcDNA4-PB1-F2Q/HK97 and pcDNA3-IKK $\beta$ . Forty eight hours post transfection, cells were lysed and IKK $\beta$  was immunoprecipitated using rabbit anti-Flag antibody. The kinase assay was performed for the indicated times in the presence of 0.0925 MBq  $^{32}$ P ATP, using GST-p65 and GST-I $\kappa$ B $\alpha$  as substrates. As a negative control (- C) non-transfected cells were used in the same experiment. Phosphorylation was detected by autoradiography. The levels of Flag-IKK $\beta$  present in the whole cell lysates (input) and immunoprecipitates (IP) were assessed by immunoblotting using rabbit anti-Flag antibody. B) Vero cells were transfected with pcDNA4-PB1-F2Q/HK97 and stimulated with 1  $\mu$ g ml $^{-1}$  LPS +800 ng ml $^{-1}$  CD14 during one hour or left untreated (medium only). The cellular localisation of endogenous p65 was visualized using a rabbit anti-p65 antibody (green). Cells expressing PB1-F2 were identified (arrow) using a monoclonal mouse anti-myc antibody (red) and nuclei were stained with 4',6-diamidino-2-phenylindole (DAPI). C) Vero cells were transfected with empty pcDNA4 or pcDNA4-PB1-F2Q/HK97 and pMACS K $^k$ .II plasmid. Cells expressing K $^k$  were selected using magnetic microbeads coated with anti-K $^k$  antibody. These cells were stimulated with 1  $\mu$ g ml $^{-1}$  LPS +800 ng ml $^{-1}$  CD14 for one hour or left untreated (medium only). Nuclear extracts were prepared and incubated with a NF- $\kappa$ B biotinylated probe. Complexes were resolved in TBE polyacrylamide gel, transferred to a membrane and biotinylated DNA was detected by chemiluminescence. doi:10.1371/journal.pone.0063852.g005

signalling is critical for macrophage survival after TLR and TNFR1 engagement [45,46].

Our finding that PB1-F2 is able to interact with IKK $\beta$  offers a possible target for the modulation of NF- $\kappa$ B signalling by this virus protein but the molecular mechanism of NF- $\kappa$ B inhibition by PB1-F2 is not fully characterized.

In our experiments full length PB1-F2 was necessary for inhibition of the NF- $\kappa$ B dependent pathways. To dissect the impact of PB1-F2 in infected cells and its role in NF- $\kappa$ B signalling, without other constrains such as N40 expression [47] or interaction with PB1 [24], generation of viruses with substitutions

in PB1-F2 residues necessary for NF- $\kappa$ B inhibition and an examination of their properties *in vitro* and *in vivo* is required. However, we could not identify such residues, since single and multiple substitutions of amino acids in the region with highest similarity to IKK $\alpha$  did not alter the effect of PB1-F2 on NF- $\kappa$ B signalling in transfected cells (data not shown).

A recent study mapped the pro-inflammatory domain of PB1-F2 peptides delivered intranasally and identified residues L62, R75, R79 and L82 as essential for the induced lung immunopathology [48]. Additionally, these residues have been associated with enhanced pathogenicity in the context of bacterial secondary

infection [49]. Three of these four residues are conserved in the alignment between PB1-F2 and IKK $\alpha$  (Fig. 2A). This region of similarity between PB1-F2 overlaps with part of the ubiquitin like domain (ULD) of IKK $\alpha$ . The ULD of IKK $\beta$  has been implicated in the dissociation of the kinase from p65 and it is suggested that the association between IKK $\beta$  and p65 may prevent the binding of p65 to its target DNA [50]. However, we were unable to demonstrate an increase in IKK $\beta$ -p65 interaction in cells expressing PB1-F2 (data not shown).

Phosphorylation of p65 by IKK $\beta$  at Ser468 [36] promotes its ubiquitination and degradation when bound to specific gene targets [37,38], thus playing an important role in the control of NF- $\kappa$ B responses [51]. It was considered that PB1-F2 might influence p65 ubiquitination by favoring the IKK $\beta$ -mediated phosphorylation at Ser468 and induce p65 degradation. We found no evidence for increased ubiquitination of p65 in cells expressing PB1-F2 (data not shown). In this context, p65 ubiquitination occurs upon binding to  $\kappa$ B sites [38,51] and here we have shown that PB1-F2 is able to inhibit the binding of NF- $\kappa$ B to DNA.

PB1-F2 modulation of IKK $\beta$  activity in the nucleus may account for our observed inhibition of NF- $\kappa$ B signalling in transfected cells. Experiments using sodium pervanadate, which induces IKK-independent I $\kappa$ B $\alpha$  phosphorylation and degradation, showed that NF- $\kappa$ B DNA binding activity is significantly reduced in IKK $\beta$ <sup>-/-</sup> cells [52]. This observation is remarkably similar to the inhibition of NF- $\kappa$ B binding to DNA observed in PB1-F2 expressing cells and also suggests that IKK $\beta$  may contribute to NF- $\kappa$ B signalling independently of its kinase activity. However the exact mechanism(s) by which IKK $\beta$  controls the expression of NF- $\kappa$ B dependent genes in the nucleus remains to be elucidated [52]. The ability of PB1-F2 proteins to modulate NF- $\kappa$ B signalling pathways did not correlate to their ability to interact with IKK $\beta$ , suggesting that PB1-F2 may recruit other protein(s) to repress IKK $\beta$ , and this may be differently regulated by the diverse PB1-F2 tested.

The observation that PB1-F2 Q/HK97 is able to inhibit NF- $\kappa$ B dependent transcription in cells overexpressing p65 raises the possibility that PB1-F2 from this virus might have a direct impact on this transcription factor, independent of its interaction with IKK $\beta$ . However, we found no evidence for direct interaction between p65 and PB1-F2 by immunoprecipitation (data not shown).

PB1-F2 has also been shown to interact with MAVS [29] and this interaction is expected to inhibit NF- $\kappa$ B activation induced by RIG-I and melanoma differentiation associated protein 5 (MDA-5) engagement. Therefore PB1-F2 may impact at different levels of NF- $\kappa$ B signalling which is reminiscent of the ability of NS1 to modulate different steps of the type I IFN induction pathway [10].

The results of deletions of PB1-F2 in the virus genome are conflicting. Goffic *et al* reported that deletion of PB1-F2 decreased NF- $\kappa$ B activation and subsequent reduction of IFN $\beta$  expression in A549 infected cells [30] and *in vivo* [31]. In contrast, similar experiments carried out by Dudek *et al*. showed increased IFN $\beta$  expression [27]. Conenello *et al*. [26] and Varga *et al*. [29] reported that PB1-F2 carrying a N66S substitution resulted in inhibition of IFN response both *in vivo* and *in vitro*. The reasons for these conflicting results may be associated with differences in the viruses used related to the level of N40 expression [47,53]; differences in interaction with other virus proteins such as PB1 [24,25], possibly to control the levels of PB1-F2 free in the cell to interact with host proteins such as IKK $\beta$ ; and variability in the ability of PB1-F2 proteins to modify the host signalling cascades, as we observe here.

It was recently reported that NS1 is also able to interact with IKK $\beta$ , impairing I $\kappa$ B $\alpha$  phosphorylation and consequent translocation of NF- $\kappa$ B dimers to the nucleus [54]. It is remarkable that a virus has evolved two different proteins to interact with the same host kinase. This not only highlights the importance of regulating NF- $\kappa$ B signalling during influenza virus infection, but also raises several questions. Are these proteins able to interact with IKK $\beta$  at the same time and form a complex? Do they synergize with each other? Do they interact with IKK $\beta$  at different times post infection and, if so, do they compete for the same binding site on IKK $\beta$ ? The answers to these questions are beyond the scope of this report. However it is worth noting that the possible competition for the same binding site on IKK $\beta$  would help to explain the conflicting results obtained with the PB1-F2 deletion mutants [26–31].

Preliminary data obtained in our laboratory indicated that deletion of the PB1-F2 ORF by mutation of the ATG and introduction of two STOP codons as described previously [22] did not increase NF- $\kappa$ B activation in influenza infected cells. However, the mutation of the PB1-F2 start codon has been shown to up-regulate N40 levels [47]. In light of this and the role of NS1 interacting with IKK $\beta$ , a mutant virus containing only the two stop codons and a deleted NS1 should be tested to unravel the potential role of the interaction between PB1-F2 and IKK $\beta$  in virus infection.

In summary, in this report we show that influenza virus protein PB1-F2 is able to modulate NF- $\kappa$ B signalling and interact with IKK $\beta$ . PB1-F2 inhibits NF- $\kappa$ B binding to DNA probably by impacting on IKK $\beta$  activity in the nucleus through a yet unknown mechanism(s). Given the key role of NF- $\kappa$ B signalling in the initiation and resolution of inflammation, this observation may shed light on the mechanisms by which PB1-F2 might be able to induce immunopathology.

## Supporting Information

**Figure S1 Alignment of the PB1-F2 protein sequences tested in this study.** Alignment of the PB1-F27 protein sequences using ClustalW (\*denotes identical residues, : denotes conservative substitutions and denotes semi-conservative substitutions). (TIF)

**Figure S2 PB1-F2 does not have a general impact on cell signaling.** A) Vero cells were co-transfected with a luciferase reporter plasmid containing six tandem copies of the IRF-1 gamma activated site (GAS) and either each of the different PB1-F2 expression vectors or the empty pcDNA4 plasmid along with the  $\beta$ -galactosidase control plasmid. Forty eight hours post-transfection, the cells were either induced or not induced with 1000 U ml<sup>-1</sup> IFN $\gamma$  for five hours, cell extracts were made and the luciferase and galactosidase activities were measured. B) Vero cells were co-transfected with a luciferase reporter plasmid containing four tandem copies of the 9–27 IFN-stimulated response element (ISRE) and either each of the different PB1-F2 expression vectors or the empty pcDNA4 plasmid along with the  $\beta$ -galactosidase control plasmid. Forty eight hours post-transfection, the cells were either induced or not induced with 1000 U ml<sup>-1</sup> IFN $\alpha$  for five hours, cell extracts were made and the luciferase and galactosidase activities were measured. Data are representative of at least 3 independent experiments. Bars represent average values and standard deviations of firefly luciferase activities from triplicate samples normalized to the expression of galactosidase. No statistically significant differences from control empty vector were observed (one-way ANOVA followed by Dunnett's test). (TIF)

**Figure S3 Expression of PB1-F2 constructs in transfected Vero cells.** Vero cells in a 24 well plate, were transfected with 600 ng of each of the different PB1-F2 constructs and PB1-F2 expression was detected by immunofluorescence using a monoclonal mouse anti-myc antibody (Sigma, M4439). (TIF)

## Acknowledgments

ALR was in receipt of an MRC Career Development Fellowship. We thank Steve Goodbourn, Steve Ley, Katrin Ritinger, for plasmids and

## References

- Medina RA, Garcia-Sastre A (2011) Influenza A viruses: new research developments. *Nat Rev Microbiol* 9: 590–603.
- Maines TR, Szretter KJ, Perrone L, Belsler JA, Bright RA, et al. (2008) Pathogenesis of emerging avian influenza viruses in mammals and the host innate immune response. *Immunol Rev* 225: 68–84.
- Tumpey TM, Garcia-Sastre A, Taubenberger JK, Palese P, Swayne DE, et al. (2005) Pathogenicity of influenza viruses with genes from the 1918 pandemic virus: functional roles of alveolar macrophages and neutrophils in limiting virus replication and mortality in mice. *J Virol* 79: 14933–14944.
- Perrone LA, Plowden JK, Garcia-Sastre A, Katz JM, Tumpey TM (2008) H5N1 and 1918 pandemic influenza virus infection results in early and excessive infiltration of macrophages and neutrophils in the lungs of mice. *PLoS Pathog* 4: e1000115.
- de Jong MD, Simmons CP, Thanh TT, Hien VM, Smith GJ, et al. (2006) Fatal outcome of human influenza A (H5N1) is associated with high viral load and hypercytokinemia. *Nat Med* 12: 1203–1207.
- Kobasa D, Jones SM, Shinya K, Kash JC, Copps J, et al. (2007) Aberrant innate immune response in lethal infection of macaques with the 1918 influenza virus. *Nature* 445: 319–323.
- Baskin CR, Bielefeldt-Ohmman H, Tumpey TM, Sabourin PJ, Long JP, et al. (2009) Early and sustained innate immune response defines pathology and death in nonhuman primates infected by highly pathogenic influenza virus. *Proc Natl Acad Sci U S A* 106: 3455–3460.
- Medzhitov R, Horng T (2009) Transcriptional control of the inflammatory response. *Nat Rev Immunol* 9: 692–703.
- Hayden MS, Ghosh S (2008) Shared principles in NF- $\kappa$ B signaling. *Cell* 132: 344–362.
- Hale BG, Randall RE, Ortin J, Jackson D (2008) The multifunctional NS1 protein of influenza A viruses. *J Gen Virol* 89: 2359–2376.
- Iwai A, Shiozaki T, Kawai T, Akira S, Kawaoka Y, et al. (2010) Influenza A virus polymerase inhibits type I interferon induction by binding to interferon beta promoter stimulator 1. *J Biol Chem* 285: 32064–32074.
- Graef KM, Vreede FT, Lau YF, McCall AW, Carr SM, et al. (2010) The PB2 subunit of the influenza virus RNA polymerase affects virulence by interacting with the mitochondrial antiviral signaling protein and inhibiting expression of beta interferon. *J Virol* 84: 8433–8445.
- Chen W, Calvo PA, Malide D, Gibbs J, Schubert U, et al. (2001) A novel influenza A virus mitochondrial protein that induces cell death. *Nat Med* 7: 1306–1312.
- Jagger BW, Wise HM, Kash JC, Walters KA, Wills NM, et al. (2012) An overlapping protein-coding region in influenza A virus segment 3 modulates the host response. *Science* 337: 199–204.
- McAuley JL, Hornung F, Boyd KL, Smith AM, McKeon R, et al. (2007) Expression of the 1918 influenza A virus PB1-F2 enhances the pathogenesis of viral and secondary bacterial pneumonia. *Cell Host Microbe* 2: 240–249.
- McAuley JL, Chipuk JE, Boyd KL, Van De Velde N, Green DR, et al. (2010) PB1-F2 proteins from H5N1 and 20 century pandemic influenza viruses cause immunopathology. *PLoS Pathog* 6: e1001014.
- Gibbs JS, Malide D, Hornung F, Bennis JR, Yewdell JW (2003) The influenza A virus PB1-F2 protein targets the inner mitochondrial membrane via a predicted basic amphipathic helix that disrupts mitochondrial function. *J Virol* 77: 7214–7224.
- Zamarin D, Garcia-Sastre A, Xiao X, Wang R, Palese P (2005) Influenza virus PB1-F2 protein induces cell death through mitochondrial ANT3 and VDAC1. *PLoS Pathog* 1: e4.
- Chanturiya AN, Basanez G, Schubert U, Henklein P, Yewdell JW, et al. (2004) PB1-F2, an influenza A virus-encoded proapoptotic mitochondrial protein, creates variably sized pores in planar lipid membranes. *J Virol* 78: 6304–6312.
- Henkel M, Mitzner D, Henklein P, Meyer-Almes FJ, Moroni A, et al. (2010) The proapoptotic influenza A virus protein PB1-F2 forms a nonselective ion channel. *PLoS One* 5: e11112.
- Mitzner D, Dudek SE, Studtucker N, Anhlan D, Mazur I, et al. (2009) Phosphorylation of the influenza A virus protein PB1-F2 by PKC is crucial for apoptosis promoting functions in monocytes. *Cell Microbiol* 11: 1502–1516.
- Zamarin D, Ortigoza MB, Palese P (2006) Influenza A virus PB1-F2 protein contributes to viral pathogenesis in mice. *Journal of Virology* 80: 7976–7983.
- Chen CJ, Chen GW, Wang CH, Huang CH, Wang YC, et al. (2010) Differential localization and function of PB1-F2 derived from different strains of influenza A virus. *J Virol* 84: 10051–10062.
- Mazur I, Anhlan D, Mitzner D, Wixler L, Schubert U, et al. (2008) The proapoptotic influenza A virus protein PB1-F2 regulates viral polymerase activity by interaction with the PB1 protein. *Cell Microbiol* 10: 1140–1152.
- McAuley JL, Zhang K, McCullers JA (2010) The effects of influenza A virus PB1-F2 protein on polymerase activity are strain specific and do not impact pathogenesis. *J Virol* 84: 558–564.
- Conenello GM, Tisoncik JR, Rosenzweig E, Varga ZT, Palese P, et al. (2011) A single N66S mutation in the PB1-F2 protein of influenza A virus increases virulence by inhibiting the early interferon response in vivo. *J Virol* 85: 652–662.
- Dudek SE, Wixler L, Nordhoff C, Nordmann A, Anhlan D, et al. (2011) The influenza virus PB1-F2 protein has interferon antagonistic activity. *Biol Chem* 392: 1135–1144.
- Varga ZT, Ramos I, Hai R, Schmolke M, Garcia-Sastre A, et al. (2011) The influenza virus protein PB1-F2 inhibits the induction of type I interferon at the level of the MAVS adaptor protein. *PLoS Pathog* 7: e1002067.
- Varga ZT, Grant A, Manicassamy B, Palese P (2012) Influenza virus protein PB1-F2 inhibits the induction of type I interferon by binding to MAVS and decreasing mitochondrial membrane potential. *J Virol* 86: 8359–8366.
- Le Goffic R, Bouguyon E, Chevalier C, Vidic J, Da Costa B, et al. (2010) Influenza A virus protein PB1-F2 exacerbates IFN-beta expression of human respiratory epithelial cells. *J Immunol* 185: 4812–4823.
- Le Goffic R, Leymarie O, Chevalier C, Rebours E, Da Costa B, et al. (2011) Transcriptomic analysis of host immune and cell death responses associated with the influenza A virus PB1-F2 protein. *PLoS Pathog* 7: e1002202.
- Visvanathan KV, Goodbourn S (1989) Double-stranded RNA activates binding of NF- $\kappa$ B to an inducible element in the human beta-interferon promoter. *EMBO J* 8: 1129–1138.
- Zell R, Krumbholz A, Eitner A, Krieg R, Halbhuer KJ, et al. (2007) Prevalence of PB1-F2 of influenza A viruses. *J Gen Virol* 88: 536–546.
- Sakurai H, Chiba H, Miyoshi H, Sugita T, Toriumi W (1999) IkappaB kinases phosphorylate NF- $\kappa$ B p65 subunit on serine 536 in the transactivation domain. *J Biol Chem* 274: 30353–30356.
- Yang F, Tang E, Guan K, Wang CY (2003) IKK beta plays an essential role in the phosphorylation of RelA/p65 on serine 536 induced by lipopolysaccharide. *J Immunol* 170: 5630–5635.
- Schwabe RF, Sakurai H (2005) IKKbeta phosphorylates p65 at S468 in transactivation domain 2. *FASEB J* 19: 1758–1760.
- Geng H, Wittwer T, Dittich-Breiholz O, Kracht M, Schmitz ML (2009) Phosphorylation of NF- $\kappa$ B p65 at Ser468 controls its COMMD1-dependent ubiquitination and target gene-specific proteasomal elimination. *EMBO Rep* 10: 381–386.
- Mao X, Gluck N, Li D, Maine GN, Li H, et al. (2009) GCN5 is a required cofactor for a ubiquitin ligase that targets NF- $\kappa$ B/RelA. *Genes Dev* 23: 849–861.
- Pugin J, Schurer-Maly CC, Leturcq D, Moriarty A, Ulevitch RJ, et al. (1993) Lipopolysaccharide activation of human endothelial and epithelial cells is mediated by lipopolysaccharide-binding protein and soluble CD14. *Proc Natl Acad Sci U S A* 90: 2744–2748.
- Rahman MM, McFadden G (2011) Modulation of NF- $\kappa$ B signalling by microbial pathogens. *Nat Rev Microbiol* 9: 291–306.
- Schmolke M, Manicassamy B, Pena L, Sutton T, Hai R, et al. (2011) Differential contribution of PB1-F2 to the virulence of highly pathogenic H5N1 influenza A virus in mammalian and avian species. *PLoS Pathog* 7: e1002186.
- Meunier I, von Messling V (2012) PB1-F2 modulates early host responses but does not affect the pathogenesis of H1N1 seasonal influenza virus. *J Virol* 86: 4271–4278.
- Sun K, Metzger DW (2008) Inhibition of pulmonary antibacterial defense by interferon-gamma during recovery from influenza infection. *Nat Med* 14: 558–564.
- Fong CH, Beben M, Didierlaurent A, Nebauer R, Hussell T, et al. (2008) An antiinflammatory role for IKKbeta through the inhibition of “classical” macrophage activation. *J Exp Med* 205: 1269–1276.

discussion; we thank Haixia Xiao, Nicole Friedrich and Saira Hussain for discussion and assistance with reverse genetics and we thank Rod Daniels for discussion and critically reviewing the manuscript.

## Author Contributions

Conceived and designed the experiments: ALR JWM. Performed the experiments: ALR. Analyzed the data: ALR JWM. Wrote the paper: ALR JWM.

45. Park JM, Greten FR, Wong A, Westrick RJ, Arthur JS, et al. (2005) Signaling pathways and genes that inhibit pathogen-induced macrophage apoptosis—CREB and NF- $\kappa$ B as key regulators. *Immunity* 23: 319–329.
46. Li ZW, Chu W, Hu Y, Delhase M, Deerinck T, et al. (1999) The IKK $\beta$  subunit of IkappaB kinase (IKK) is essential for nuclear factor kappaB activation and prevention of apoptosis. *J Exp Med* 189: 1839–1845.
47. Wise HM, Foglein A, Sun J, Dalton RM, Patel S, et al. (2009) A complicated message: Identification of a novel PB1-related protein translated from influenza A virus segment 2 mRNA. *J Virol* 83: 8021–8031.
48. Alymova IV, Green AM, van de Velde N, McAuley JL, Boyd KL, et al. (2011) Immunopathogenic and antibacterial effects of H3N2 influenza A virus PB1-F2 map to amino acid residues 62, 75, 79, and 82. *J Virol* 85: 12324–12333.
49. Weeks-Gorospe JN, Hurtig HR, Iverson AR, Schuneman MJ, Webby RJ, et al. (2012) Naturally occurring swine influenza A virus PB1-F2 phenotypes that contribute to superinfection with Gram-positive respiratory pathogens. *J Virol* 86: 9035–9043.
50. May MJ, Larsen SE, Shim JH, Madge LA, Ghosh S (2004) A novel ubiquitin-like domain in IkappaB kinase beta is required for functional activity of the kinase. *J Biol Chem* 279: 45528–45539.
51. Saccani S, Marazzi I, Beg AA, Natoli G (2004) Degradation of promoter-bound p65/RelA is essential for the prompt termination of the nuclear factor kappaB response. *J Exp Med* 200: 107–113.
52. Gloire G, Horion J, El Mjiyad N, Bex F, Chariot A, et al. (2007) Promoter-dependent effect of IKK $\alpha$  on NF- $\kappa$ B/p65 DNA binding. *J Biol Chem* 282: 21308–21318.
53. Tauber S, Ligertwood Y, Quigg-Nicol M, Dutia BM, Elliott RM (2012) Behaviour of influenza A viruses differentially expressing segment 2 gene products in vitro and in vivo. *J Gen Virol* 93: 840–849.
54. Gao S, Song L, Li J, Zhang Z, Peng H, et al. (2012) Influenza A virus-encoded NS1 virulence factor protein inhibits innate immune response by targeting IKK. *Cell Microbiol* 14: 1849–1866.
